# Supplementary material
Source: PubMed Central journal article supplement (PMC7847547)
Supplement: JB.00563-20-s0001.pdf [file JB.00563-20-s0001.pdf]

**Supplemental table 1: Strains**

| <b>Strain list</b>                                                                 |                              |                                                                  |                      |
|------------------------------------------------------------------------------------|------------------------------|------------------------------------------------------------------|----------------------|
| <b>Strain #</b>                                                                    | <b>Nickname</b>              | <b>Genotype</b>                                                  | <b>Figure panel</b>  |
| CB1527, CB1291,<br>CB1529, CB1531                                                  | PstP <sub>Msmeg</sub> T134A  | mc2155 ΔPstP::lox<br>L5::pCT94-<br>p766tetON6-<br>PstPsmegT134A  | 1B                   |
| CB1520, CB1523,<br>CB1360, CB1361,<br>CB1525, CB1439                               | PstP <sub>Msmeg</sub> T134E  | mc2155 ΔPstP::lox<br>L5::pCT94-<br>p766tetON6-<br>PstPsmegT134E  | 1B                   |
| CB1430, CB1431,<br>CB1514, CB1515,<br>CB1515, CB1516,<br>CB1517, CB1518,<br>CB1432 | PstP <sub>Msmeg</sub> T138A  | mc2155 ΔpstP::lox<br>L5::pCT94-<br>p766tetON6-<br>PstPSmeg_T138A | 1B                   |
| CB1405, CB1363,<br>CB1364, CB1365                                                  | PstP <sub>Msmeg</sub> T138E  | mc2155 ΔPstP::lox<br>L5::pCT94-<br>p766tetON6-<br>PstPsmegT138E  | 1B                   |
| CB1437, CB1438,<br>CB1292                                                          | PstP <sub>Msmeg</sub> WT     | mc2155 ΔpstP::lox<br>L5::pCT94-<br>p766tetON6-<br>PstPSmegWT     | 1B, 2A-D, 3A-F, 4A-D |
| CB1290, CB1300,<br>CB1301                                                          | PstP <sub>Msmeg</sub> T171A  | mc2155 ΔpstP::lox<br>L5::pCT94-<br>p766tetON6-<br>PstPSmeg_T171A | 1B, 2A-D, 3A-F, 4A-D |
| CB1366, CB1367,<br>CB1368                                                          | PstP <sub>Msmeg</sub> T171E  | mc2155 ΔPstP::lox<br>L5::pCT94-<br>p766tetON6-<br>PstPsmegT171E  | 1B, 2A-D, 3A-F, 4A-D |
| CB1709                                                                             | his-SUMO-CwIM <sub>Mtb</sub> | BL21 Codon Plus/<br>pET-his-SUMO-CwIM                            | 5A                   |
| CB1710                                                                             | his-PstPcWT <sub>Mtb</sub>   | BL21 Codon Plus/<br>pET28-his-PstPc Mtb                          | 5A                   |
| CB1711                                                                             | PstPcT174E <sub>Mtb</sub>    | BL21 Codon Plus/<br>pET28-his-PstP(TB<br>cyto) T174E             | 5A                   |
| CB1069                                                                             | His-MBP-PknB <sub>Mtb</sub>  | BI21 Codon<br>Plus/pHMGWA-His-<br>MBP-PknB(KD)                   | 5A                   |

**Supplemental table 2- Plasmids**

| Plasmid list     |                                                                 |                                                                |                                      |
|------------------|-----------------------------------------------------------------|----------------------------------------------------------------|--------------------------------------|
| In strain #      | Plasmid name                                                    | Used in strains                                                | Reference for parent vector          |
| CB1284           | p1206-p766TetON6-PstP <sub>Msmeg</sub> T134A                    | CB1527, CB1291, CB1529, CB1531                                 | this paper                           |
| CB1354           | pCB1285-p766tetON6-PstP <sub>Msmeg</sub> T134E                  | CB1520, CB1523, CB1360, CB1361, CB1525, CB1439                 | this paper                           |
| CB1282           | p1207-p766TetON6-PstP <sub>Msmeg</sub> T138A                    | CB1430, CB1431, CB1514, CB1515, CB1516, CB1517, CB1518, CB1432 | this paper                           |
| CB1355           | pCB1285-tetON6-PstP <sub>Msmeg</sub> T138E                      | CB1405, CB1363, CB1364, CB1365                                 | this paper                           |
| CB1285           | p1210-p766TetON6-PstP <sub>Msmeg</sub> WT                       | CB1437, CB1438, CB1292                                         | this paper                           |
| CB1283           | p1208-p766TetON6-PstP <sub>Msmeg</sub> T171A                    | CB1290, CB1300, CB1301                                         | this paper                           |
| CB1356           | pCB1285-p766tetON6-PstP <sub>Msmeg</sub> T171E                  | CB1366, CB1367, CB1368                                         | this paper                           |
| CB174            | pL5 PTetO Msm PonA1 truncation A-FLAG clone 1                   | in all of the strains above                                    | (1)                                  |
| CT298            | pET-his-SUMO-CwIM                                               | CB1709                                                         | this paper                           |
| CT216            | pET28-his-PstPc Mtb                                             | CB1710                                                         | this paper                           |
| CT216            | pET28-PstP(TB cyto) T174E                                       | CB1711                                                         | this paper                           |
|                  | pJV53                                                           |                                                                | (2)                                  |
| CB1175 (KP37-24) | pKM55 ΔpstP::loxP L5::p750TetOFF-pstP <sub>Mtb</sub> WT-DAS-Zeo |                                                                | this paper, courtesy of Kenan Murphy |

1. **Kieser KJ, Boutte CC, Kester JC, Baer CE, Barczak AK, Meniche X, Chao MC, Rego EH, Sassetti CM, Fortune SM, Rubin EJ.** 2015. Phosphorylation of the Peptidoglycan Synthase PonA1 Governs the Rate of Polar Elongation in Mycobacteria. *PLoS Pathog* **11**:e1005010.
2. **van Kessel JC, Hatfull GF.** 2008. Mycobacterial recombineering. *Methods Mol Biol* **435**:203–215.

**Supplemental table 3- Primers**

| Primer list |                                                      |                                                              |          |
|-------------|------------------------------------------------------|--------------------------------------------------------------|----------|
| Strain #    | Feature                                              | Primer                                                       | Primer # |
| CB1284      | p1206-p766TetON6-PstP <sub>Msmeg</sub> T134A-strep   | TGCTTAATTAAGAAGGAGATATACATatgaccctcgttctccgctacg             | FS 11    |
|             |                                                      | GAAGTGGGGGTGGCTCCAGTCGGCGCCGGTGGAGTGtgacaccgcccggcagttcgtccc | FS 12    |
|             |                                                      | TAGGGTCCCCAATTAATTAGCTAAAGCTTtcaCTTCTCGAACTGGGGGTGGCTCCAGTCG | FS 13    |
|             |                                                      | cagatcaccaaggacgacGCgttcgtgcagaccctcgtc                      | FS 14    |
|             |                                                      | gacgagggtctgcacgaaCGCgtcgtccttggtgatctg                      | FS 15    |
|             |                                                      | CGTTTAATACTGCATGCACTCTAGAgctaccaggcctagatctggggacc           | FS 21    |
|             |                                                      | cgtagcggagaacgaggggtcatATGaggagagccactttgtacaagaaag          | FS 22    |
| CB1354      | pCB1285-p766tetON6-PstP <sub>Msmeg</sub> T134E-strep | tttctgtacaaagtggctctcctCATatgaccctcgttctccgctac              | FS 40    |
|             |                                                      | acagatcaccaaggacgacGAGttcgtgcagaccctcgt                      | FS 41    |
|             |                                                      | acgaggggtctgcacgaaCTCgtcgtccttggtgatctg                      | FS 42    |
|             |                                                      | TAGGGTCCCCAATTAATTAGCTAAAGCTTtcaCTTCTCGAACTGGGGGTGGCTCCAGTCG | FS 12    |
| CB1282      | p1207-p766TetON6-PstP <sub>Msmeg</sub> T138A-strep   | TGCTTAATTAAGAAGGAGATATACATatgaccctcgttctccgctacg             | FS 10    |
|             |                                                      | GAAGTGGGGGTGGCTCCAGTCGGCGCCGGTGGAGTGtgacaccgcccggcagttcgtccc | FS 11    |
|             |                                                      | TAGGGTCCCCAATTAATTAGCTAAAGCTTtcaCTTCTCGAACTGGGGGTGGCTCCAGTCG | FS 12    |
|             |                                                      | gacgacacctcgtgcagGCCctcgtgcagagggccgc                        | FS 15    |
|             |                                                      | gcgccctcgtgcagagGGCctgcacgaaggtgctcgtc                       | FS 16    |
|             |                                                      | CGTTTAATACTGCATGCACTCTAGAgctaccaggcctagatctggggacc           | FS 21    |
|             |                                                      | cgtagcggagaacgaggggtcatATGaggagagccactttgtacaagaaag          | FS 22    |
| CB1355      | pCB1285-tetON6-PstP <sub>Msmeg</sub> T138E-strep     | TAGGGTCCCCAATTAATTAGCTAAAGCTTtcaCTTCTCGAACTGGGGGTGGCTCCAGTCG | FS 40    |
|             |                                                      | tttctgtacaaagtggctctcctCATatgaccctcgttctccgctac              | FS 43    |
|             |                                                      | gacgacacgttcgtgcagGAGctcgtgcagagggccgc                       | FS 44    |
|             |                                                      | gcgccctcgtgcagagCTCctgcacgaacgtgctcgtc                       | FS 12    |
| CB1285      | p1210-p766TetON6-PstP <sub>Msmeg</sub> WT-strep      | TGCTTAATTAAGAAGGAGATATACATatgaccctcgttctccgctacg             | FS 10    |
|             |                                                      | GAAGTGGGGGTGGCTCCAGTCGGCGCCGGTGGAGTGtgacaccgcccggcagttcgtccc | FS 11    |
|             |                                                      | TAGGGTCCCCAATTAATTAGCTAAAGCTTtcaCTTCTCGAACTGGGGGTGGCTCCAGTCG | FS 15    |
|             |                                                      | CGTTTAATACTGCATGCACTCTAGAgctaccaggcctagatctggggacc           | FS 21    |
|             |                                                      | cgtagcggagaacgaggggtcatATGaggagagccactttgtacaagaaag          | FS 22    |
| CB1283      | p1208-p766TetON6-                                    | TGCTTAATTAAGAAGGAGATATACATatgaccctc                          | FS 10    |

|         |                                                          |                                                                                                               |                                         |
|---------|----------------------------------------------------------|---------------------------------------------------------------------------------------------------------------|-----------------------------------------|
|         | PstP <sub>Msmeg</sub> T171A-strep                        | gttctccgctacg                                                                                                 |                                         |
|         |                                                          | GAACTGGGGGTGGCTCCAGTCGGCGCCGGT<br>GGAGTGtgacaccgcccgagttcgtccc                                                | FS 11                                   |
|         |                                                          | TAGGGTCCCCAATTAATTAGCTAAAGCTTcaC<br>TTCTCGAACTGGGGGTGGCTCCAGTCG                                               | FS 12                                   |
|         |                                                          | ggccacgaggtcgagccgGCGctgatcatgcgcgaggcc                                                                       | FS 17                                   |
|         |                                                          | ggcctcgcgcatgatcagCGCcggtcgacctcgtggcc                                                                        | FS 18                                   |
|         |                                                          | CGTTTAATACTGCATGCACTCTAGAgctaccaggc<br>ctagatctggggacc                                                        | FS 21                                   |
|         |                                                          | cgtagcggagaacgagggatATGaggagagccactttgtac<br>aagaaag                                                          | FS 22                                   |
| CB1356  | pCB1285-p766tetON6-<br>PstP <sub>Msmeg</sub> T171E-strep | TAGGGTCCCCAATTAATTAGCTAAAGCTTcaC<br>TTCTCGAACTGGGGGTGGCTCCAGTCG                                               | FS 12                                   |
|         |                                                          | tttctgtacaaagtggctctctCATatgaccctcgttccgctac                                                                  | FS 40                                   |
|         |                                                          | ggccacgaggtcgagccgGAGctgatcatgcgcgaggcc                                                                       | FS 45                                   |
|         |                                                          | ggcctcgcgcatgatcagCTCcggtcgacctcgtggcc                                                                        | FS 46                                   |
| CT216   | pET28-his-PstPcWT <sub>Mtb</sub>                         | cctggtgccgcgcgagccatggtgcgcggtgacctggtcct<br>gcat                                                             | FS 33                                   |
|         |                                                          | gtggtggtggtggtggtgctcgagtcaccgtcgccccaccaccgt<br>ggcc                                                         | FS 34                                   |
| CT216   | pET28-PstPc(TB<br>cyto)T174E                             | cctggtgccgcgcgagccatggtgcgcggtgacctggtcct<br>gcat                                                             | FS 33                                   |
|         |                                                          | gtggtggtggtggtggtgctcgagtcaccgtcgccccaccaccgt<br>ggcc                                                         | FS 34                                   |
|         |                                                          | gttgaccggccatgaggtcgaaccgGAGctgacctgcgagaa<br>gccccgccccggtgat                                                | CB1460                                  |
|         |                                                          | atcaccggcgcggtctctcgatggtcagCTCcggttcgacctc<br>atggccggtcaac                                                  | CB1461                                  |
| CT298   | pET-his-SUMO-CwIM <sub>Mtb</sub>                         | Tcacagagaacagattggtgatccatgccaggtccgcgccccg<br>aa                                                             | CB1272                                  |
|         |                                                          | gtgctcgacaagcttattactcgagtaagaaccgccgagctacc                                                                  | CB1273                                  |
| KP35-79 | ΔpstP-hyg L5::p46-<br>pstP <sub>Mtb</sub> WT-strep       | CGGATCGGCAAGACGGTAATCGAGCTGCGCC<br>CGTGAGCCCGCGCACGCGAGGAGCAGACGC<br>TCTAGAACTAGTGGATCC                       | S1256-<br>SMEG-<br>PstP-<br>P1b         |
|         |                                                          | GCGGGCGTGACGGTAACCGGCGACTGGGGT<br>TGCGTCGTCATTCTCCTCCTTTCTTACTTCT<br>AGACTCGAGGTACCG                          | S1257-<br>SMEG-<br>PstP-<br>P2b         |
|         |                                                          | CCAACGGCACTTACCTTGACAGGGCGAAGGT<br>GACAACAGCAGTAAAGGTTCCCATTGGCGCG<br>CCGGTGC GGATCGGCAAGACGGTAATCG           | S1258-<br>SMEG-<br>PstP-<br>P3b         |
|         |                                                          | TCGACGATCAACAGGGCCACGGTGGTGATCA<br>GCGCCGCGAACCCAGCAGCAGCAGTTCCG<br>CATTGCGCCGGTTCGGGAGCGGCGGCGTGA<br>CGGTAAC | S1259-<br>SMEG-<br>PstP-<br>P4b         |
|         |                                                          | AACTCGACGGCATGGGCAC                                                                                           | S1260-<br>SMEG-<br>PstP-del<br>Int-For2 |
|         |                                                          | GCGAGATGCCAGGAAGGAG                                                                                           | S1261-<br>SMEG-                         |

|  |  |                         |                                              |
|--|--|-------------------------|----------------------------------------------|
|  |  |                         | PstP-del<br>Int-Rev2                         |
|  |  | GCGCGGTGATGGTGAGAC      | S1121-<br>SMEG-<br>PstP del<br>P6-<br>ExtFor |
|  |  | GCAGGCTCGCGTAGGAATCATCC | S486-<br>Hyg-N-<br>out                       |
|  |  | GAACTGCTCGCCTTCACCTTCC  | S538-<br>Hyg-C-<br>out                       |
|  |  | TTCAAGAACACCACCACGAGC   | S1122-<br>SMEG-<br>PstP del<br>P7<br>ExtRev  |

Figure S1

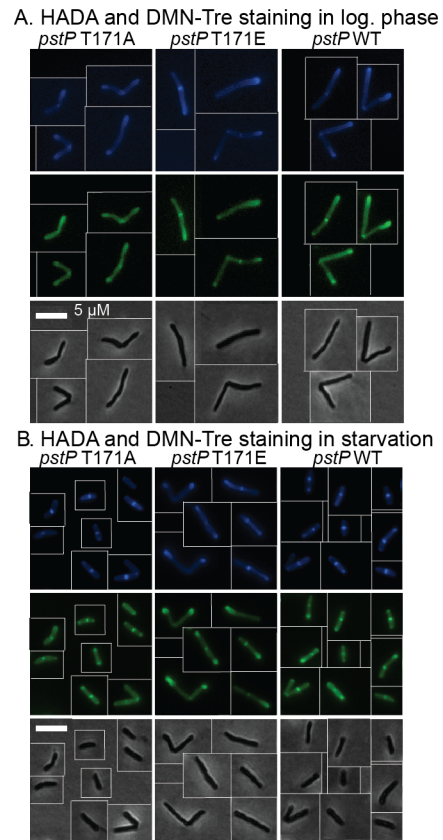

(A) and (B) Representative micrographs of log. phase cells (A) and starved cells in HdB with no glycerol (B) from *pstP* allele strains (WT, T17A and T171E) stained with the fluorescent dyes HADA (blue) and DMN-Tre (green). Corresponding phase images are shown on the bottom panel. The scale bar applies to all images.

Figure S2

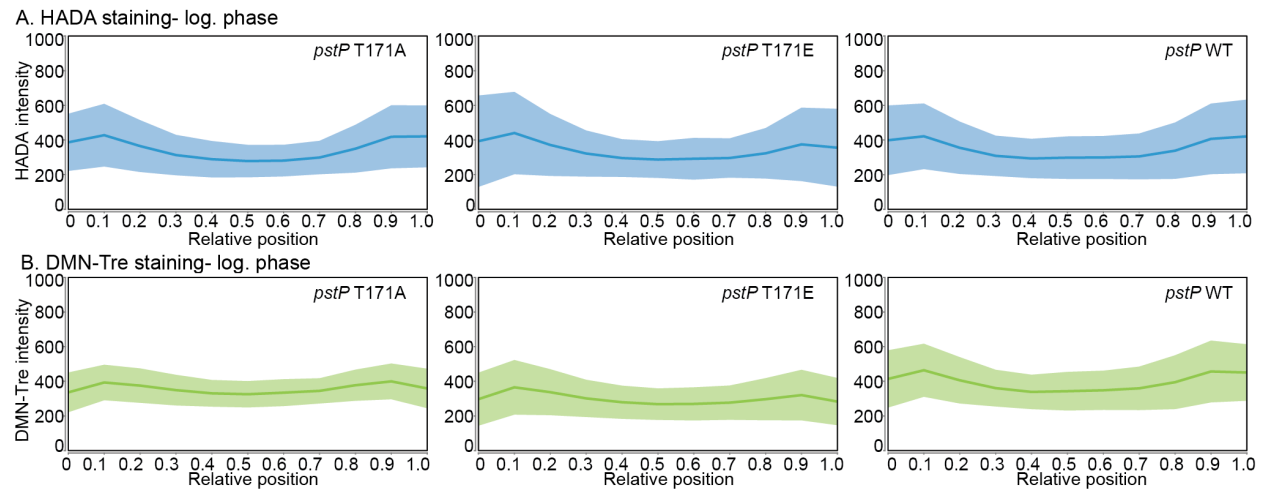

(A) and (B) Intensity profiles of HADA (A) and DMN-Tre (B) signal in cells (pole to pole) from *pstP* allele strains (WT, T17A and T171E) in log. phase. Shaded region represents standard deviation. Solid line represents mean of intensities.

Biological triplicates of each *pstP* allelic variant were analyzed. At least 265 cells from each of the *pstP* allelic variant (at least 62 cells from each biological triplicate strain of each genotype) in log. phase were used to plot the signal intensities.

Figure S3

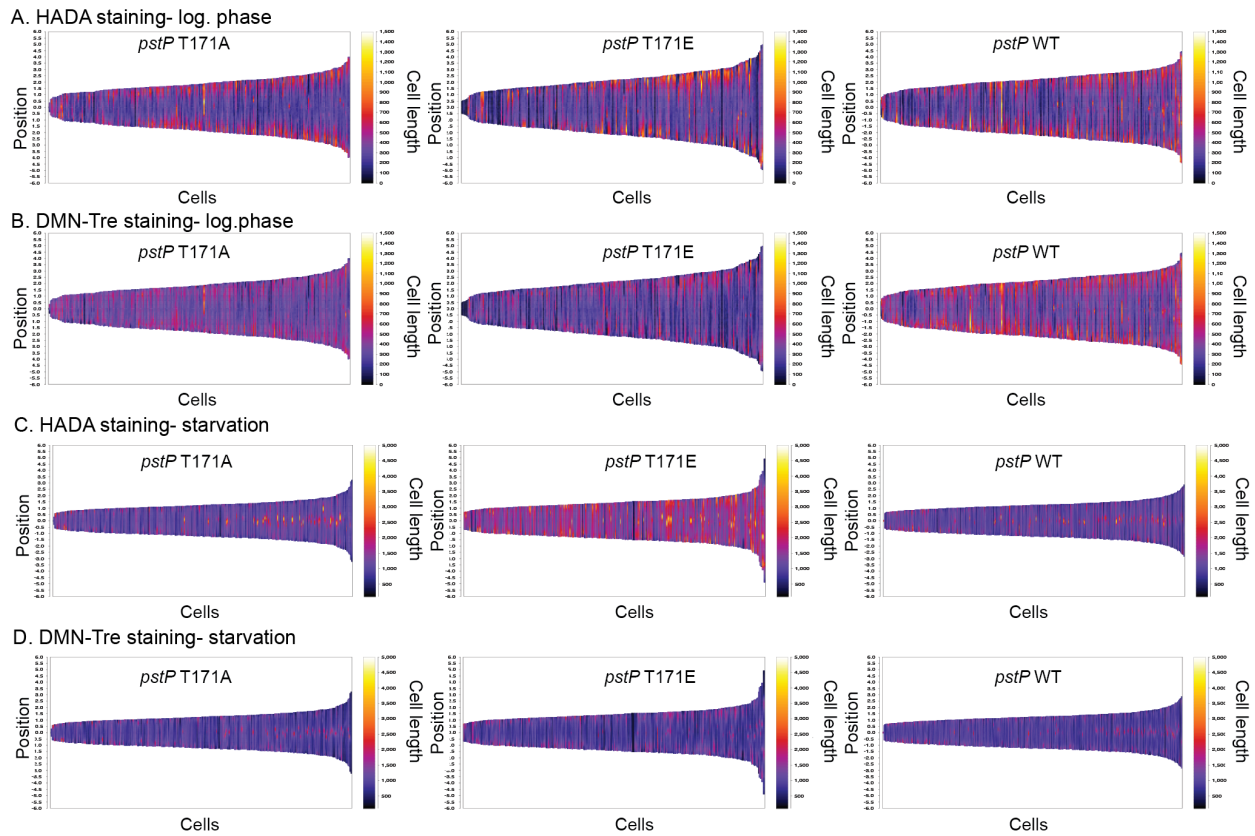

(A) and (B) Demographs showing intensities of fluorescent dyes HADA (A) and DMN-Tre (B) signal in individual cells from *pstP* allele strains (WT, T17A and T171E) in log phase.

(C) and (D) Demographs showing intensities of HADA (C) and DMN-Tre (D) signal in individual cells starved in HdB with no glycerol for 5.5 hours from *pstP* allele strains (WT, T17A and T171E).

Biological triplicates of each *pstP* allelic variant were analyzed. Signal intensities from at least 265 cells from each *pstP* allelic variant (at least 62 cells from each biological triplicate of each genotype) in log phase were plotted in the demograph (A) and (B). Signal intensities from at least 300 cells from each *pstP* allelic variant (at least 100 cells



from each biological triplicate strain of each genotype) in starvation were plotted in the demograph (C) and (D).

Figure S4

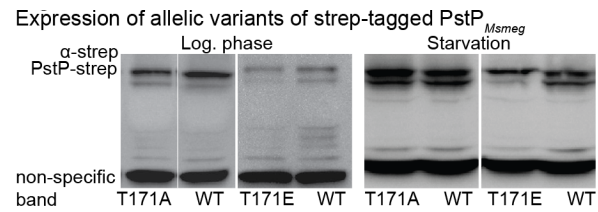

α-strep Western blots of allelic variants of strep-tagged PstP<sup>Msmeg</sup> in log. (left panel) and starvation phase (right panel). A non-specific band at the bottom in all strains was seen in the blots.
